# Supplementary material for: Re-analysis of the coral Acropora digitifera transcriptome reveals a complex lncRNAs-mRNAs interaction network implicated in Symbiodinium infection
Source: PubMed Central journal article supplement (PMC6335708; doi:10.1186/s12864-019-5429-3), 2019-01-16

A

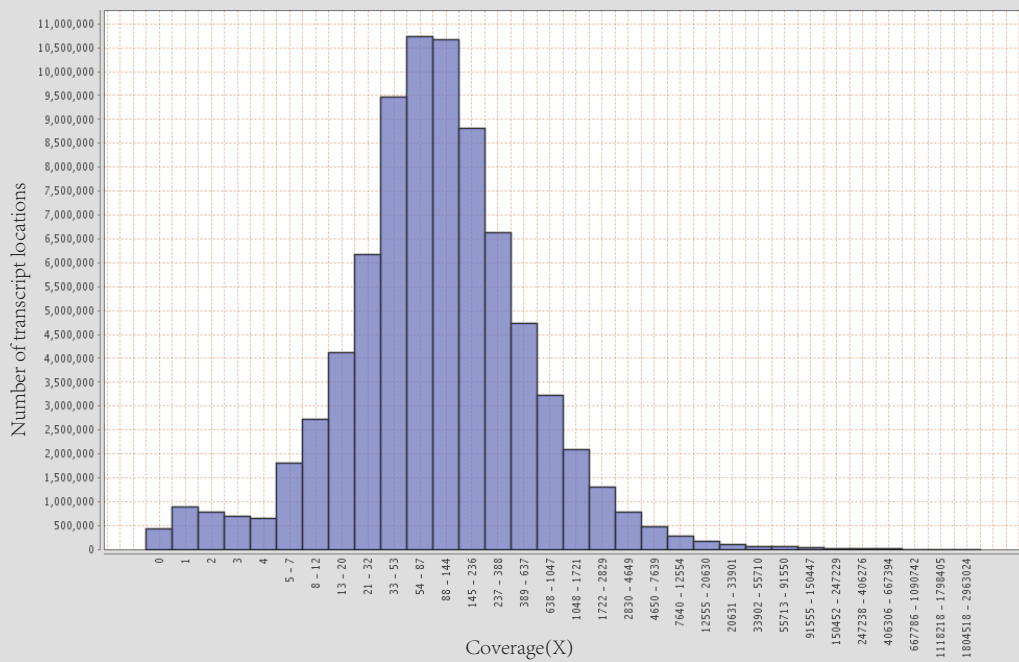

B

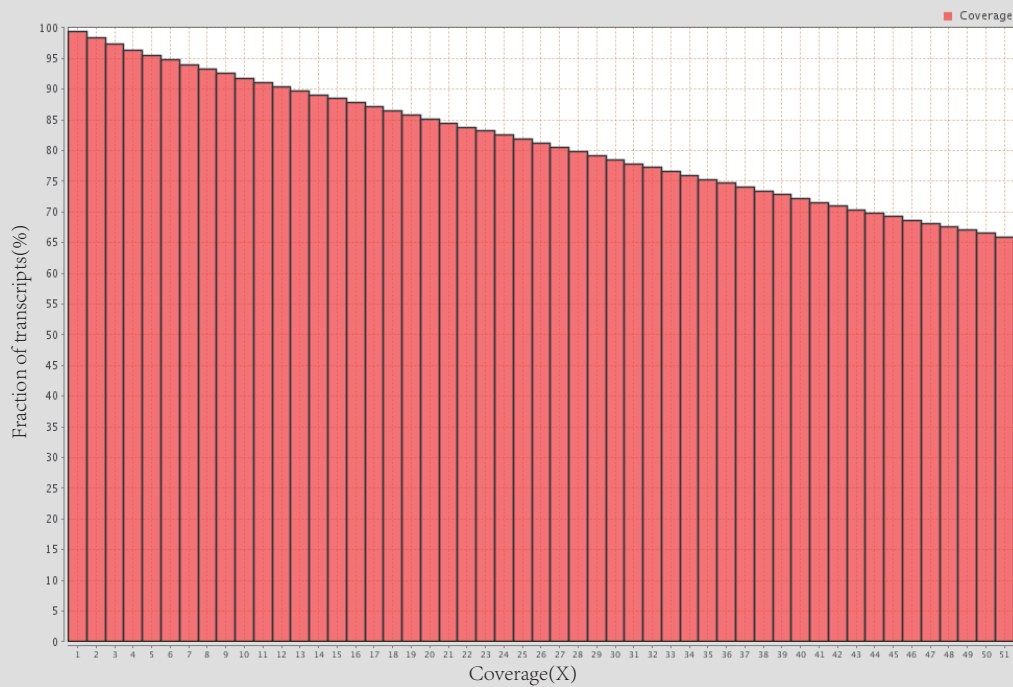

Supplement: 12864_2019_5429_MOESM6_ESM.pdf [file 12864_2019_5429_MOESM6_ESM.pdf]
