# Supplementary material for: Re-analysis of the coral Acropora digitifera transcriptome reveals a complex lncRNAs-mRNAs interaction network implicated in Symbiodinium infection
Source: PubMed Central journal article supplement (PMC6335708; doi:10.1186/s12864-019-5429-3), 2019-01-16
Supplement: 12864_2019_5429_MOESM7_ESM.pdf [file 12864_2019_5429_MOESM7_ESM.pdf]

**Color Key  
and Histogram**

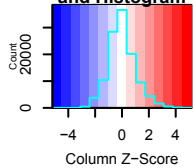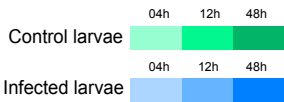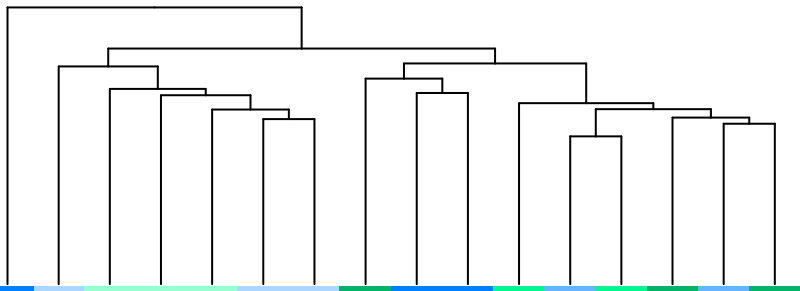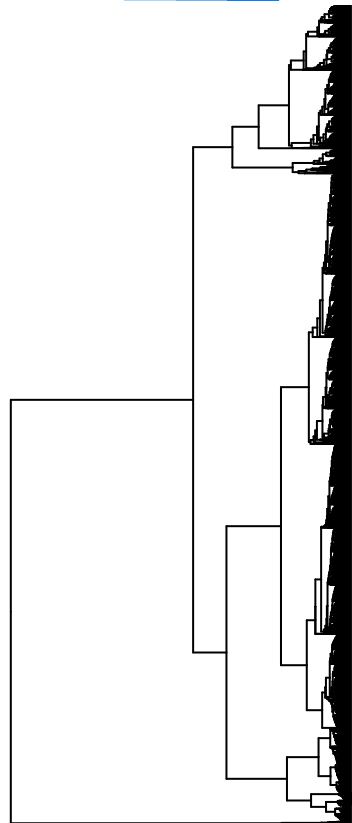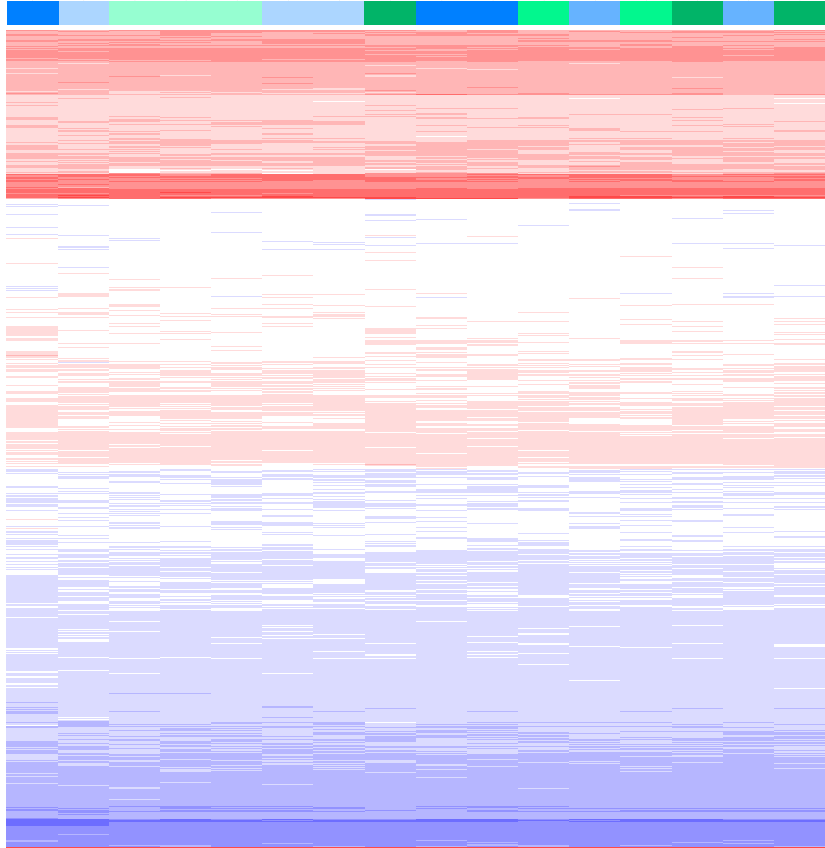

SRR3106397  
SRR3106388  
SRR3106384  
SRR3106385  
SRR3106386  
SRR3106387  
SRR3106389  
SRR3106395  
SRR3106399  
SRR3106398  
SRR3106391  
SRR3106392  
SRR3106390  
SRR3106394  
SRR3106393  
SRR3106396
