# Supplementary material for: Re-analysis of the coral Acropora digitifera transcriptome reveals a complex lncRNAs-mRNAs interaction network implicated in Symbiodinium infection
Source: PubMed Central journal article supplement (PMC6335708; doi:10.1186/s12864-019-5429-3), 2019-01-16
Supplement: 12864_2019_5429_MOESM9_ESM.pdf [file 12864_2019_5429_MOESM9_ESM.pdf]

PC2: 16% variance

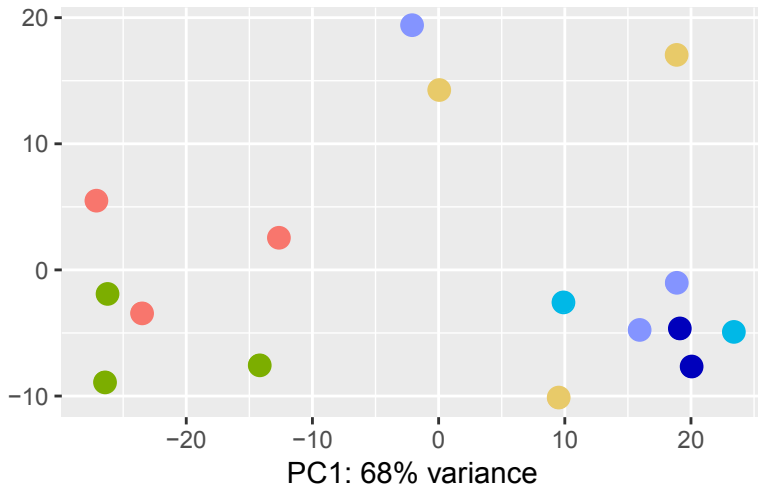

group

- SRR3106384 : control 4h
- SRR3106385 : control 4h
- SRR3106386 : control 4h
- SRR3106387 : Symbiodinium-infected 4h
- SRR3106388 : Symbiodinium-infected 4h
- SRR3106389 : Symbiodinium-infected 4h
- SRR3106390 : control 12h
- SRR3106391 : control 12h
- SRR3106392 : Symbiodinium-infected 12h
- SRR3106393 : Symbiodinium-infected 12h
- SRR3106394 : control 48h
- SRR3106395 : control 48h
- SRR3106396 : control 48h
- SRR3106397 : Symbiodinium-infected 48h
- SRR3106398 : Symbiodinium-infected 48h
- SRR3106399 : Symbiodinium-infected 48h
